# Supplementary material
Source: PubMed Central journal article supplement (PMC2667724)
Supplement: M807822200_1.pdf [file M807822200_1.pdf]

## Supplemental fig 1.

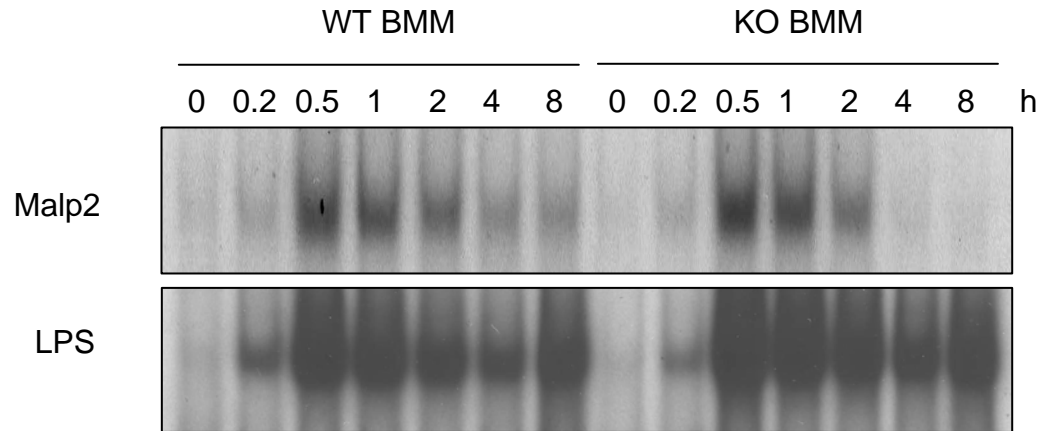

**Supplemental fig 1. Malp2 and low concentration LPS mediated NF $\kappa$ B activation in IRAK2 deficient macrophages**  
Cell lysates from wild-type (WT) and IRAK2-deficient (KO) BM-derived macrophages either untreated or treated with Malp2 (10 ng/ml) or LPS (0.1  $\mu$ g/ml) for indicated times, and analyzed by electrophoresis mobility shift assay with an NF $\kappa$ B-specific probe.
